# Supplementary material for: A Single Nucleotide Polymorphism rs1010816 Predicts Sorafenib Therapeutic Outcomes in Advanced Hepatocellular Carcinoma
Source: MDPI journal article supplement (doi:10.3390/ijms24021681), 2023-01-14
Supplement: s1 [file s1]

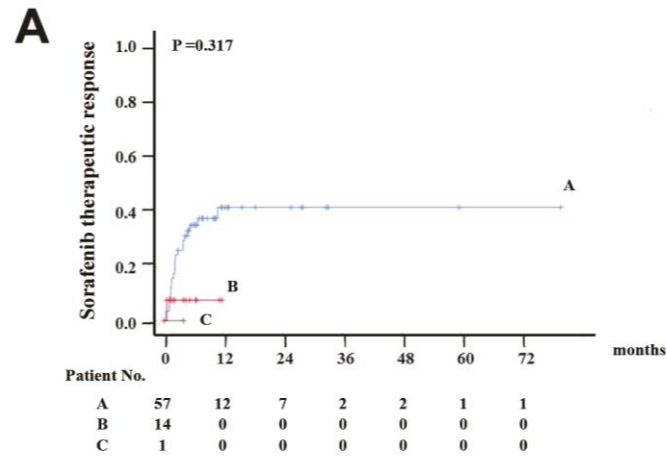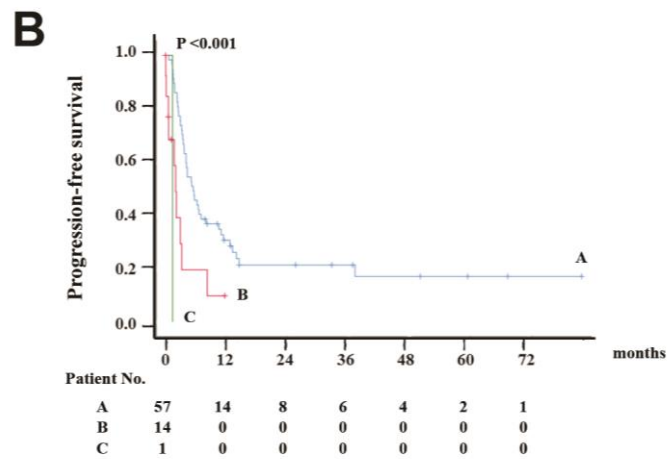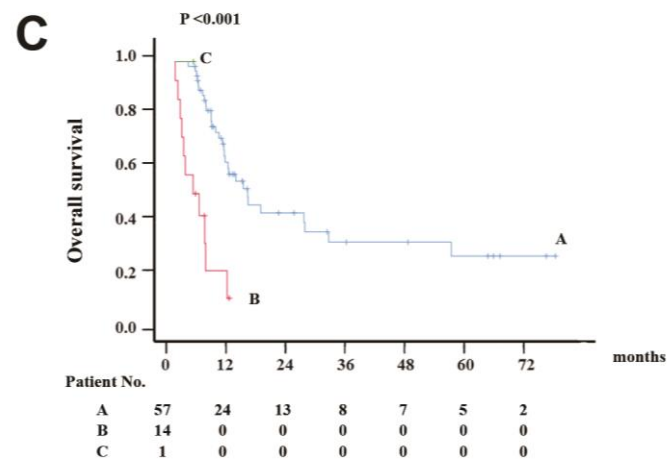

**Supplementary Figure S1.** Kaplan-Meier analysis in advanced HCC patients receiving sorafenib therapy. The clinical significances of Child-Pugh score on Sorafenib therapeutic response (A), progression-free survival (B) and overall survival (C) were analyzed by Kaplan-Meier method with log-ranked test.
